# Supplementary material for: Variable paralog expression underlies phenotype variation
Source: eLife journal article supplement (doi:10.7554/elife.79247), 2022-09-22
Supplement: supp [file elife-79247-supp-v1.zip]

A

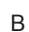C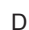E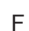G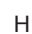

| with-in individual variation           |    |                                        |         |
|----------------------------------------|----|----------------------------------------|---------|
| <u>genotype comparison</u>             |    | <u>Dunnet's test</u>                   |         |
| <i>mef2ca</i> +/-<br><i>mef2aa</i> +/- | vs | <i>mef2ca</i> -/-<br><i>mef2aa</i> +/- | 0.2907  |
| <i>mef2ca</i> +/-<br><i>mef2aa</i> +/- | vs | <i>mef2ca</i> +/-<br><i>mef2aa</i> -/- | 0.8784  |
| <i>mef2ca</i> -/-<br><i>mef2aa</i> +/- | vs | <i>mef2ca</i> -/-<br><i>mef2aa</i> -/- | >0.9999 |
