# Supplementary material for: Variable paralog expression underlies phenotype variation
Source: eLife journal article supplement (doi:10.7554/elife.79247), 2022-09-22
Supplement: supp [file elife-79247-supp-v1.zip]

# Figure 3 - figure supplement 1

|               |                                                                                                       |     |
|---------------|-------------------------------------------------------------------------------------------------------|-----|
| <i>mef2b</i>  | MGRKKIQISRLDQRNRQVTFTTKRKFGLMKKAYELSVLCDCEIALIIFNSTNRLFQYAST                                          | 60  |
| <i>mef2ca</i> | MGRKKIQIARIMDERNRQVTFTTKRKFGLMKKAYELSVLCDCEIALIIFNSTNKLFFQYAST                                        | 60  |
| <i>mef2cb</i> | MGRKKIQITRIMDERNRQVTFTTKRKFGLMKKAYELSVLCDCEIALIIFNSTNKLFFQYAST                                        | 60  |
| <i>mef2d</i>  | MGRKKIQIQRITDERNRQVTFTTKRKFGLMKKAYELSVLCDCEIALIIFNHSNKLFFQYAST                                        | 60  |
| <i>mef2aa</i> | MGRKKIQITRIMDERNRQVTFTTKRKFGLMKKAYELSVLCDCEIALIIFNSSNKLFFQYAST                                        | 60  |
| <i>mef2ab</i> | MGRKKIQITRIMEERNRQVTFTTKRKFGLMKKAYELSVLCDCEIALIIFNSSNKLFFQYAST<br>***** ** :***** :*:*****            | 60  |
| <i>mef2b</i>  | DMDKVLLKYTEYSEPHESRTNTDILETLRRKGLG-LESSEIDPEDGV-T-MGAEKY---H                                          | 114 |
| <i>mef2ca</i> | DMDKVLLKYTEYNEPHESTRNSDIVETLRKKGLNGCDSPDIDAEDSGHSPESDKYRKIN                                           | 120 |
| <i>mef2cb</i> | DMDKVLLKYTEYNEPHESTRNSDIVEALSKKENKGGESLELESA-LALTPLTEEKYKQIN                                          | 119 |
| <i>mef2d</i>  | DMDKVLLKYTEYNEPHESTRNADIEALNKKKEHRDSESPDPEEP-FSLTPRTEEKYKKID                                          | 119 |
| <i>mef2aa</i> | DMDKVLLKYTEYNEPHESTRNSDIVEALNKKKEHRGCDSPDPDAS-YVLTPHTEEKYKKIN                                         | 119 |
| <i>mef2ab</i> | DMDKVLLKYTEYNEPHESTRNSDIVEVLNKKKEHRGCDSPDPDAS-YVLTPHAEKYYKQIN<br>*****.,*****:*:*. * : * : : : : ** . | 119 |
| <i>mef2b</i>  | DGMDLSLARQRYYAPSLHSEV-----INTSAENGYI-----NSSNP                                                        | 152 |
| <i>mef2ca</i> | EDIDLMSRQRLC---AIPQSNYDMPVSIIPVSNPNSLIYGHPGA-----SLGNPN                                               | 167 |
| <i>mef2cb</i> | EEFDLMIKAQKIP---AVPSSTYDMTIPVNN-----QI-----YPGNHN                                                     | 155 |
| <i>mef2d</i>  | EEFDKMMQSYRLS---STVPAPTFSMPVTVPVSNQSPLPFSNPSSLVTTSTFV-TSTLTDP                                         | 176 |
| <i>mef2aa</i> | EEFDNMMRNHKIP---TALPPQNFSMHVAVPVTNPAMSYNPGASLSSQSLSAASLSDGA                                           | 177 |
| <i>mef2ab</i> | EEFDNMMRNHKIP---ATLSHQSFMSPLTLPVTNPTTSLYSTNGSLDTPV-----TLSGTN<br>: : * : : : : : .                    | 172 |
| <i>mef2b</i>  | LGA-----HRTPSYKPLCTRPGSTG-----TVSA                                                                    | 176 |
| <i>mef2ca</i> | LLPLTHPSLQRNSMSPGVTHRPPSAGNTGGDMAADLGGGAGTST-----GNGYGNH                                              | 218 |
| <i>mef2cb</i> | LLPLAHHGLQRNSMSPGVTHRPPSAG---GLMGTDLTGAGTSAGKDGIPTYRNGYGNH                                            | 212 |
| <i>mef2d</i>  | LLSPQQPQLQRNTVSPGLPQRPASAGAL---LGDDLNS-----NGACPSPVANGYVSA                                            | 227 |
| <i>mef2aa</i> | MLSPPQGSMHRSVV---PPQRPSTGST---A-----GNGFVNP                                                           | 210 |
| <i>mef2ab</i> | ILSLPNTLQTNTSTAGIDGMPASSEVT---L-----PNGVHSS<br>: : . * * :                                            | 208 |
| <i>mef2b</i>  | NSHPALMGPHAGLGYSMFPHGSLSRALMKTPPP--LNMSSDGRRVEAHA---GLCGTR                                            | 230 |
| <i>mef2ca</i> | RNSPGLLVSPG-----NMSKNLQAKSPPS--NMMSL-SRKPDLRLVLIPPGAKNTM                                              | 265 |
| <i>mef2cb</i> | RNSPGLLVSSG-----GMNKSMAQAKSPPP--VNLGMNSRKPDLRLVLIPPGAKNNM                                             | 260 |
| <i>mef2d</i>  | RASPGLLSVSN-----GNSMGKVQAKSPPPSTQMA-NSRKPDLRVITSQSSKGLM                                               | 278 |
| <i>mef2aa</i> | RGSPGLLGTPS-----GNGLGKVMPAKSPPPPGNMGIGSRKPDLRVVIPPSSKGM-                                              | 261 |
| <i>mef2ab</i> | HVVGFGSGNSE-----ENSIGQVVSAKS-----STANRKLDLRLVLIPPVCKSSS<br>. . : . . : : * : . . * : : : .            | 252 |
| <i>mef2b</i>  | SSLANAVR---ESTKRA-LYQS-MHAGGHMMAMGKTGLLGHGLNYSPTS-----EYSH                                            | 277 |
| <i>mef2ca</i> | PSI-----NQRISSSQSAQSLSTPVVSVATPTLPGEVMGGYPSAINTSYGTEYSL                                               | 315 |
| <i>mef2cb</i> | PSI-----NQRINNSQSAQSLATPVVSVATPTLPQGVMGGYPSAISTSYGTEYSL                                               | 310 |
| <i>mef2d</i>  | QLTDEEELVSENAQRLGTSQVTQPLTTPPVSVATPSSL-----TPFSMPTAYNTEYQL                                            | 332 |
| <i>mef2aa</i> | --M---PPLN---TQRISSSQSTQPLATPVVSVTTPSLAQQL--VYSGMPTAYNSEYSL                                           | 311 |
| <i>mef2ab</i> | SSM---PPEGDEHLRTDSSQSSQSLSTPVVSVATPSSLHPQL--VYSSMTTSTFTTGV--<br>* * : : : . *                         | 305 |
| <i>mef2b</i>  | -----P--GYTVGFQRSSMNTWQPLTHQDAHQSMI-S-----                                                            | 306 |
| <i>mef2ca</i> | SSGDLSSLSAFNSSASLHLGSMTGWQP---NMQHS-----                                                              | 347 |
| <i>mef2cb</i> | SSADLSSISGFNSANTLHLGSMSGWQQHQIQINMQHS-----                                                            | 346 |
| <i>mef2d</i>  | TSADLTALQAFTPSGALLPGNMTTWQQQQQPSVSVQQPQQQPSVSVQQQTQQQQQQQQQPQQ                                        | 392 |
| <i>mef2aa</i> | SSAELSSLQGFSGPGL-SIGSVSAWQQHQ-----                                                                    | 339 |
| <i>mef2ab</i> | -----                                                                                                 | 305 |
| <i>mef2b</i>  | PGMAS--GGSCSYP--SQSSSPSSPSHPSLNLSIKSERTSPVHMISP---TPPS-----H                                          | 354 |
| <i>mef2ca</i> | --GLGHLG-NCSSAQLCQSSALSLP--SNQNLIHKEPVSPPRDRASG--TPGLYGVQP--                                          | 399 |
| <i>mef2cb</i> | --ALSQLG-NCSSSHLCQGSNLSLP--STQSLHIKSEPVSPPRDRSSS--TPGGYGQLPSH                                         | 401 |
| <i>mef2d</i>  | LTLASLSNLVPVGTIPHGATLTVN--TNPSISIKSEPVSPPNRDRSTPSSTAGAVGVVSGL                                         | 450 |
| <i>mef2aa</i> | LGQAALSSLVGGHLPQGSNLSIN--TSQNVNIKSEPIPPRERVTPSGFPPQ-----                                              | 390 |
| <i>mef2ab</i> | -----                                                                                                 | 305 |
| <i>mef2b</i>  | HMLQ-----HSPIAEPKSSSCPPSDEYADLQREEAQK---SSFSGQQ---QGP                                                 | 396 |
| <i>mef2ca</i> | -----QTPLRQDSGRSPVD--SLSSCGSS--YDGSDRDEHRA---NFHSPVGLMRAA--                                           | 444 |
| <i>mef2cb</i> | QQHQGPTSQGRQDSGRSPAD--SLSSCGSS--HEGSDRDEHRP---DFHSPLGLGRPG--                                          | 452 |
| <i>mef2d</i>  | TVSQYPGTLRLIPTGRSPVD--SISSNGSS--YEGSDRDDSGQPRPPDFSGLGLLRATGD                                          | 506 |
| <i>mef2aa</i> | ---QQQPPSGRPDMGRSPVD--SLSSSCSS--YDGSREDHRP---DFHSPLGLGRPP--                                           | 438 |
| <i>mef2ab</i> | -----                                                                                                 | 305 |
| <i>mef2b</i>  | NRDPPETKSSPNPKQQDIS-NGWIR                                                                             | 420 |
| <i>mef2ca</i> | ----ENERQSPSVKRMRLSEAGWAS                                                                             | 465 |
| <i>mef2cb</i> | ----LDDQDSPSIKRIRLSE-GWAT                                                                             | 472 |
| <i>mef2d</i>  | QPAQAEQQESANVKRMRLD--TWVT                                                                             | 529 |
| <i>mef2aa</i> | -AGGADERESPSVKRMRLD--TWVT                                                                             | 460 |
| <i>mef2ab</i> | -----                                                                                                 | 305 |
