# Supplementary material for: Variable paralog expression underlies phenotype variation
Source: eLife journal article supplement (doi:10.7554/elife.79247), 2022-09-22
Supplement: supp [file elife-79247-supp-v1.zip]

Archive with 16 entries (16 files):
- elife_poa_e79247_Figure_1_figure_supplement_1.pdf
- elife_poa_e79247_Figure_3_figure_supplement_1.pdf
- elife_poa_e79247_Figure_4_figure_supplement_1.pdf
- elife_poa_e79247_Figure_5_figure_supplement_1.pdf
- elife_poa_e79247_Figure_2_figure_supplement_2.pdf
- elife_poa_e79247_Figure_1_source_data_1.xlsx
- elife_poa_e79247_Figure_2_source_data_1.xlsx
- elife_poa_e79247_Figure_4_source_data_1.xlsx
- elife_poa_e79247_Figure_4_source_data_2.xlsx
- elife_poa_e79247_Figure_4_source_data_3.xlsx
- elife_poa_e79247_Figure_4_source_data_4.xlsx
- elife_poa_e79247_Figure_5_source_data_1.xlsx
- elife_poa_e79247_Figure_6_source_data_1.xlsx
- elife_poa_e79247_Figure_7_source_data_1.xlsx
- elife_poa_e79247_Figure_8_source_data_1.xlsx
- elife_poa_e79247_Transparent_Reporting_File.pdf
