# Supplementary material for: Variable paralog expression underlies phenotype variation
Source: eLife journal article supplement (doi:10.7554/elife.79247), 2022-09-22
Supplement: supp [file elife-79247-supp-v1.zip › elife_poa_e79247_Figure_1_source_data_1.xlsx]

## Sheet: Sheet1
	b1086	%	total= 38
	# mutants
	ectopic bone	73	27
	joint fused	97	37
	short symplectic	100	38
	small MC	84	32
	small CH	60	23
	hm joint fused	95	37
mef2ca wt						mef2ca b1086
Left	Right	Total	DI			Left	Right	total	DI
148.118	152.349	300.467	4.231			51.521	60.075	111.596	8.554
169.094	166.613	335.707	2.481			134.921	140.576	275.497	5.655
165.833	167.06	332.893	1.227			130.741	147.655	278.396	16.914
155.676	166.55	322.226	10.874			47.805	26.96	74.765	20.845
164.175	156.254	320.429	7.921			49.234	81.714	130.948	32.48
145.551	155.186	300.737	9.635			66.406	109.895	176.301	43.489
161.418	167.275	328.693	5.857			69.612	67.796	137.408	1.816
159.749	170.835	330.584	11.086			75.311	95.311	170.622	20
160.091	167.162	327.253	7.071			73.456	78.103	151.559	4.647
164.984	153.525	318.509	11.459			70.608	64.406	135.014	6.202
162.418	169.031	331.449	6.613			74.425	54.171	128.596	20.254
174.331	171.159	345.49	3.172			100.669	125.084	225.753	24.415
147.137	143.902	291.039	3.235			68.201	62.456	130.657	5.745
146.27	153.021	299.291	6.751			78.178	54.626	132.804	23.552
135.742	134.774	270.516	0.968			63.873	84.484	148.357	20.611
155.698	147.649	303.347	8.049			135.547	131.886	267.433	3.661
148.729	151.614	300.343	2.885			62.779	33.465	96.244	29.314
153.513	166.157	319.67	12.644			139.753	135.272	275.025	4.481
148.881	158.341	307.222	9.46			55.155	73.566	128.721	18.411
171.407	167.877	339.284	3.53			76.888	59.966	136.854	16.922
146.323	159.26	305.583	12.937			111.545	128.263	239.808	16.718
163.51	157.894	321.404	5.616			43.92	76.719	120.639	32.799
						52.821	84.961	137.782	32.14
						60.9	48.161	109.061	12.739
						41.451	56.003	97.454	14.552
						48.111	58.417	106.528	10.306
						70.422	65.015	135.437	5.407
						81.75	53.539	135.289	28.211
						82.344	55.524	137.868	26.82
						68.671	35.013	103.684	33.658
						80.134	78.073	158.207	2.061
						68.486	77.641	146.127	9.155
						71.159	58.939	130.098	12.22
						66.684	98.497	165.181	31.813
						71.448	78.547	149.995	7.099
						42.337	49.705	92.042	7.368
						41.85	35.166	77.016	6.684
						24.869	23.667	48.536	1.202
						67.702	76.455	144.157	8.753
						29.074	23.771	52.845	5.303
						36.127	67.244	103.371	31.117
						58.304	71.629	129.933	13.325
						42.677	65.016	107.693	22.339
						79.201	65.744	144.945	13.457
