# Supplementary material for: Variable paralog expression underlies phenotype variation
Source: eLife journal article supplement (doi:10.7554/elife.79247), 2022-09-22
Supplement: supp [file elife-79247-supp-v1.zip › elife_poa_e79247_Figure_2_source_data_1.xlsx]

## Sheet: Sheet1
Total
Low WT	Low Het	Low Mut				High WT	High Het	High Mut
300.455	223.949	227.607				208.797	233.273	165.19
288.376	306.121	132.046				227.911	298.006	161.033
309.828	292.275	183.791				220.958	209.473	120.853
309.123	303.621	156.974				267.831	202.318	60.539
299.748	286.013	130.196				226.168	198.482	139.251
292.631	263.706	147.111				183.631	205.621	64.851
	302.093	219.673				211.615	218.057	82.99
	284.619	157.372				296.061	232.227	86.79
	303.736	145.512					171.595
	282.465						108.053
	309.807
	295.667
	300.596
DI
Low WT	Low Het	Low Mut	High WT	High Het	High Mut
12.349	35.641	18.896	23.203	25.277	2.167
6.05	9.545	3.89	2.935	11.692	9.183
2.104	5.751	8.271	4.246	33.299	34.258
5.361	8.983	5.469	35.077	5.504	20.806
6.438	6.693	10.532	10.088	13.008	8.933
17.391	15.924	12.343	2.389	9.627	0.064
	0.871	15.493	10.629	11.009	15.494
	13.073	64.247	12.805	23.851	0.851
	2.6	41.98		12.433
	6.823			3.799
	2.279
	7.383
	11.55
