# Supplementary material for: Variable paralog expression underlies phenotype variation
Source: eLife journal article supplement (doi:10.7554/elife.79247), 2022-09-22
Supplement: supp [file elife-79247-supp-v1.zip › elife_poa_e79247_Figure_4_source_data_1.xlsx]

## Sheet: Sheet1
Relative Quantification RT-PCR											Relative Quantification RT-PCR											Relative Quantification RT-PCR											Relative Quantification RT-PCR											Relative Quantification RT-PCR
							normalized to 24 hpf											normalized to 24 hpf										normalized to 24 hpf												normalized to 24 hpf
PCR Date	2018-04-06		Expt.:	24 48 hrs							PCR Date	2018-04-06		Expt.:	24 48 hrs							PCR Date	2018-06-26		Expt.:	24 48 hrs							PCR Date	2018-06-26		Expt.:	24 48 hrs							PCR Date	2018-06-26		Expt.:	24 48 hrs
		CT	CT	Mean									CT	CT	Mean									CT	CT	Mean									CT	CT	Mean									CT	CT	Mean
Sample	Treatment	mef2ca	eef1a1l1	CT 18S	DCT	DDCT	2-DDCT	Mean			Sample	Treatment	mef2cb	eef1a1l1	CT 18S	DCT	DDCT	2-DDCT	Mean			Sample	Treatment	mef2d	eef1a1l1	CT 18S	DCT	DDCT	2-DDCT	Mean			Sample	Treatment	mef2aa	eef1a1l1	CT 18S	DCT	DDCT	2-DDCT	Mean			Sample	Treatment	mef2ab	eef1a1l1	CT 18S	DCT
2	18 2	28.4109	16.3003	16.4458	11.9651	-3.25883	9.57208	12.2981	6.75681	18 hpf	2	18 2	27.8172	16.3003	16.4458	11.3714	-4.53013	23.1049	23.862	7.26143	18 hpf	2	18 2	35.3785	16.3003	16.4458	18.9326	0.660422	0.632693	0.774648	1.37373	18 hpf	2	18 2	35.4413	16.3003	16.4458	18.9954	1.81448	0.284306	0.525747	0.680232	18 hpf	2	18 2	29.3199	16.3003	16.4458	12.8741
*			16.368		-16.4458	-31.6697					*		27.8223	16.368		11.3764	-4.52512	23.0249				*		34.7697	16.368		18.3238	0.0516226	0.964851				*		34.6387	16.368		18.1929	1.0119	0.495892				*		29.9188	16.368		13.473
		27.7605	16.6692		11.3147	-3.90921	15.0241						27.6774	16.6692		11.2316	-4.66994	25.4561						35.1792	16.6692		18.7334	0.461165	0.7264						33.9541	16.6692		17.5082	0.32727	0.797043						28.8439	16.6692		12.3981
3	18 3	28.5741	15.3662	15.7048	12.8693	-2.35457	5.11443	5.99792			3	18 3	27.9509	15.3662	15.7048	12.2461	-3.65542	12.6006	11.6589			3	18 3	34.5475	15.3662	15.7048	18.8427	0.570491	0.673388	0.801804			3	18 3	34.339	15.3662	15.7048	18.6342	1.45327	0.365194	0.62054			3	18 3	29.1712	15.3662	15.7048	13.4665
		28.146	15.7842		12.4412	-2.78271	6.88142						28.1243	15.7842		12.4195	-3.48202	11.1736						34.5285	15.7842		18.8238	0.55157	0.682277						33.3767	15.7842		17.672	0.491031	0.711516						28.5333	15.7842		12.8286
			15.9639										28.1205	15.9639		12.4158	-3.48577	11.2027						33.9069	15.9639		18.2022	-0.0700427	1.04975						33.2351	15.9639		17.5304	0.349399	0.784911						28.7044	15.9639		12.9996
34	18 fam 2	27.7897	15.0264	15.3604	12.4293	-2.79464	6.93857	5.55106			34	18 fam 2	28.5891	15.0264	15.3604	13.2287	-2.67282	6.37675	6.9188			34	18 fam 2	33.3325	15.0264	15.3604	17.9721	-0.30015	1.23127	1.48559			34	18 fam 2	32.8371	15.0264	15.3604	17.4767	0.295764	0.814641	0.678658			34	18 fam 2	27.8909	15.0264	15.3604	12.5305
		28.3509	15.3442		12.9905	-2.23343	4.70251						28.4859	15.3442		13.1256	-2.776	6.84949						33.186	15.3442		17.8256	-0.446584	1.36281						33.1315	15.3442		17.7711	0.59011	0.664292						28.1381	15.3442		12.7777
		28.2589	15.7105		12.8985	-2.32542	5.01211						28.3493	15.7105		12.9889	-2.91268	7.53017						32.7352	15.7105		17.3748	-0.897383	1.86268						33.3855	15.7105		18.0251	0.844142	0.557042						28.6232	15.7105		13.2628
45	18 fam 3	28.0548	14.904	14.9333	13.1215	-2.10242	4.29428	3.18017			45	18 fam 3	29.4803	14.904	14.9333	14.547	-1.35454	2.55716	3.20656			45	18 fam 3	31.6899	14.904	14.9333	16.7566	-1.51565	2.85928	2.43289			45	18 fam 3	31.9571	14.904	14.9333	17.0238	-0.157187	1.11511	0.895983			45	18 fam 3	26.4056	14.904	14.9333	11.4723
		29.0241	14.9627		14.0908	-1.13312	2.19332						29.1228	14.9627		14.1895	-1.7121	3.27638						31.9704	14.9627		17.0371	-1.23513	2.35403						32.5347	14.9627		17.6014	0.42041	0.747212						26.5509	14.9627		11.6176
		28.547			13.6137	-1.61018	3.05291						28.9141			13.9808	-1.92073	3.78616						32.1452			17.2119	-1.06029	2.08535						32.3907			17.4574	0.276439	0.825626						26.5046			11.5713
4	20 1	30.4165	15.982	16.3496	14.0668	-1.15707	2.23003	4.25498	3.38976	20 hpf	4	20 1	30.4741	15.982	16.3496	14.1245	-1.77702	3.42719	3.26214	3.13167	20 hpf	4	20 1	35.2894	15.982	16.3496	18.9398	0.667568	0.629567	0.443938	1.34891	20 hpf	4	20 1	33.0713	15.982	16.3496	16.7216	-0.459316	1.37489	1.44723	1.75442	20 hpf	4	20 1	29.2269	15.982	16.3496	12.8773
		28.8045	16.4709		12.4549	-2.76901	6.8164						30.5907	16.4709		14.2411	-1.66047	3.16119						36.5746	16.4709		20.225	1.95283	0.25831						32.9269	16.4709		16.5773	-0.603656	1.51956						28.9122	16.4709		12.5626
		29.6788	16.596		13.3292	-1.89473	3.71852						30.574	16.596		14.2244	-1.6772	3.19806							16.596		-16.3496	-34.6218								16.596			-17.181								16.596
5	20 2	29.7167	15.2323	15.5538	14.1629	-1.06105	2.08644	3.75775			5	20 2	29.8078	15.2323	15.5538	14.254	-1.64757	3.13305	2.89552			5	20 2	32.4181	15.2323	15.5538	16.8642	-1.40797	2.65363	2.39319			5	20 2	31.8376	15.2323	15.5538	16.2838	-0.897195	1.86244	2.25175			5	20 2	26.2716	15.2323	15.5538	10.7178
		28.2298	16.1853		12.676	-2.54791	5.84788						29.9556	16.1853		14.4018	-1.49979	2.82802						32.6418	16.1853		17.088	-1.18421	2.27239						31.533	16.1853		15.9792	-1.20178	2.30023						26.4581	16.1853		10.9043
		29.0383	15.2439		13.4845	-1.73938	3.33892						30.0089	15.2439		14.455	-1.44651	2.72548						32.6538	15.2439		17.1	-1.1722	2.25355						31.3604	15.2439		15.8066	-1.37439	2.59259						26.274	15.2439		10.7202
6	20 3		14.9484	14.971	-14.971	-30.1949		2.15655			6	20 3	29.1238	14.9484	14.971	14.1528	-1.74875		3.23735			6	20 3	32.7264	14.9484	14.971	17.7554	-0.516849	1.43083	1.20961			6	20 3	31.5388	14.9484	14.971	16.5678	-0.613177	1.52962	1.56427			6	20 3	25.0024	14.9484	14.971	10.0314
*		29.016	15.0301		14.045	-1.17893	2.2641				*		29.026	15.0301		14.055	-1.84659	3.5965				*		33.0894	15.0301		18.1184	-0.153812	1.11251				*		31.3099	15.0301		16.3389	-0.842101	1.79266				*		25.3701	15.0301		10.3991
		29.16	14.9346		14.189	-1.03492	2.049						29.3474	14.9346		14.3764	-1.52517	2.8782						33.1249	14.9346		18.1538	-0.11837	1.08551						31.6972	14.9346		16.7262	-0.45473	1.37053						25.5206	14.9346		10.5496
7	22 1	29.9034	15.5495	15.7241	14.1793	-1.04461	2.06281	2.4633	3.53656	22 hpf	7	22 1	29.9649	15.5495	15.7241	14.2407	-1.66085	3.16203	3.10395	9.53468	22 hpf	7	22 1	33.4278	15.5495	15.7241	17.7036	-0.568572	1.48305	1.24717	1.50775	22 hpf	7	22 1	33.1433	15.5495	15.7241	17.4192	0.238242	0.847778	0.874974	1.18296	22 hpf	7	22 1	27.619	15.5495	15.7241	11.8948
		29.3367	15.8692		13.6126	-1.61135	3.05537						30.0169	15.8692		14.2928	-1.60878	3.04993						33.8527	15.8692		18.1285	-0.143687	1.10472						33.3854	15.8692		17.6613	0.480315	0.716821						27.2004	15.8692		11.4763
		29.7643	15.7538		14.0401	-1.18378	2.27171						29.9935	15.7538		14.2693	-1.63221	3.09988						33.7901	15.7538		18.0659	-0.20629	1.15372						32.8206	15.7538		17.0965	-0.0845047	1.06032						27.5357	15.7538		11.8116
9	22 3	28.3967	15.1948	15.2363	13.1604	-2.0635	4.18	4.60983			9	22 3	27.1788	15.1948	15.2363	11.9425	-3.95906	15.5524	15.9654			9	22 3	32.5835	15.1948	15.2363	17.3472	-0.925012	1.8987	1.76834			9	22 3	31.818	15.1948	15.2363	16.5817	-0.599272	1.51495	1.49095			9	22 3	26.5817	15.1948	15.2363	11.3454
		28.1269	15.5372		12.8906	-2.33332	5.03965						27.1135	15.5372		11.8772	-4.02435	16.2723						32.7491	15.5372		17.5128	-0.759401	1.69279						31.7913	15.5372		16.555	-0.625914	1.54319						26.461	15.5372		11.2248
			14.9769										27.1314	14.9769		11.8951	-4.00644	16.0716						32.7315	14.9769		17.4952	-0.776983	1.71354						31.9167	14.9769		16.6804	-0.500517	1.41472						26.3443	14.9769		11.1081
10	23 1	29.4599	15.7928	15.792	13.6679	-1.556	2.94038	4.04821	3.44387	23 hpf	10	23 1	28.4914	15.7928	15.792	12.6994	-3.20215	9.20326	9.85199	9.70134	23 hpf	10	23 1	32.7964	15.7928	15.792	17.0044	-1.26784	2.40801	1.79637	2.20629	23 hpf	10	23 1	31.4806	15.7928	15.792	15.6885	-1.49244	2.81364	2.72551	2.83982	23 hpf	10	23 1	25.8321	15.7928	15.792	10.04
		28.5142			12.7221	-2.50179	5.66386						28.441			12.6489	-3.25262	9.53092						33.5342			17.7422	-0.529995	1.44392						31.7448			15.9528	-1.22815	2.34266						25.9187			10.1266
		29.192	15.7913		13.4	-1.82391	3.5404						28.2577	15.7913		12.4657	-3.43587	10.8218						33.444	15.7913		17.6519	-0.620277	1.53717						31.3783	15.7913		15.5863	-1.59467	3.02025						25.4747	15.7913		9.68272
11	23 2	29.304	15.9866	15.8966	13.4073	-1.81657	3.52244	3.48394			11	23 2	27.8801	15.9866	15.8966	11.9834	-3.91813	15.1173	15.2229			11	23 2	35.395	15.9866	15.8966	19.4984	1.22619	0.427444				11	23 2	31.8248	15.9866	15.8966	15.9282	-1.25277	2.38299	2.15785			11	23 2	25.6005	15.9866	15.8966	9.70389
		29.2552	15.8157		13.3586	-1.86532	3.6435						27.9906	15.8157		12.094	-3.80757	14.0021						35.9271	15.8157		20.0305	1.75825	0.295607						32.1411	15.8157		16.2444	-0.936521	1.91391						25.9194	15.8157		10.0227
		29.4043	15.8877		13.5076	-1.71628	3.28589						27.7495	15.8877		11.8529	-4.0487	16.5493							15.8877		-15.8966	-34.1689							31.9555	15.8877		16.0588	-1.12212	2.17667						25.5111	15.8877		9.61442
12	23 3	30.6304	16.7321	16.7334	13.8969	-1.32698	2.50877	2.79946			12	23 3	30.8988	16.7321	16.7334	14.1653	-1.73622	3.3316	4.0291			12	23 3	33.7625	16.7321	16.7334	17.0291	-1.24311	2.36707	2.6162			12	23 3	31.9502	16.7321	16.7334	15.2168	-1.96416	3.90187	3.6361			12	23 3	26.2627	16.7321	16.7334	9.52927
		30.2954	16.7651		13.562	-1.66195	3.16445						30.4397	16.7651		13.7063	-2.19527	4.57975						33.5753	16.7651		16.8419	-1.4303	2.69503						32.2466	16.7651		15.5132	-1.66776	3.17722						26.2389	16.7651		9.5055
		30.511	16.7031		13.7776	-1.44634	2.72515						30.5729	16.7031		13.8395	-2.0621	4.17594						33.5272	16.7031		16.7938	-1.47845	2.7865						31.9773	16.7031		15.2439	-1.93705	3.82922						25.9914	16.7031		9.25797
13	23.5 1	28.8697	14.3567	14.7084	14.1613	-1.0626	2.08869	2.07	1.90691	23.5 hpf	13	23.5 1	31.1399	14.3567	14.7084	16.4315	0.529955	0.692576	0.961149	0.85028	23.5 hpf	13	23.5 1	32.9692	14.3567	14.7084	18.2607	-0.0114645	1.00798	0.986202	1.13999	23.5 hpf	13	23.5 1	31.7156	14.3567	14.7084	17.0072	-0.173775	1.12801	1.23196	1.368	23.5 hpf	13	23.5 1	25.5518	14.3567	14.7084	10.8434
		28.8958	14.3903		14.1874	-1.03655	2.05131						30.5942	14.3903		15.8858	-0.0157434	1.01097						32.8876	14.3903		18.1792	-0.0930075	1.06659						31.4217	14.3903		16.7133	-0.467671	1.38288						25.7459	14.3903		11.0374
			15.3783										30.3713	15.3783		15.6629	-0.238663	1.1799						33.1585	15.3783		18.45	0.177825	0.884035						31.6445	15.3783		16.9361	-0.244896	1.18501						25.7755	15.3783		11.0671
14	23.5 2	29.3794	14.4578	14.8657	14.5136	-0.710283	1.63612	1.74381			14	23.5 2	31.6489	14.4578	14.8657	16.7831	0.881561	0.54278	0.739412			14	23.5 2	32.8857	14.4578	14.8657	18.0199	-0.252283	1.19109	1.29377			14	23.5 2	31.2172	14.4578	14.8657	16.3514	-0.829541	1.77712	1.50403			14	23.5 2	25.5973	14.4578	14.8657	10.7316
		29.201	14.7428		14.3352	-0.888698	1.8515						30.9734	14.7428		16.1076	0.20609	0.866883						32.8228	14.7428		17.9571	-0.315149	1.24414						31.802	14.7428		16.9363	-0.244693	1.18484						25.6797	14.7428		10.8139
			15.3966										31.0739	15.3966		16.2081	0.306552	0.808572						32.6058	15.3966		17.7401	-0.532156	1.44609						31.4143	15.3966		16.5486	-0.63239	1.55013						25.7041	15.3966		10.8384
16	24 1	29.9142	14.9562	15.12	14.7942	-0.429751	1.347	0.923133	1.05875	24 hpf	16	24 1	30.5006	14.9562	15.12	15.3806	-0.520947	1.4349	1.18766	1.02221	24 hpf	16	24 1	33.5508	14.9562	15.12	18.4308	0.158612	0.895887	0.744562	1.0501	24 hpf	16	24 1	33.0022	14.9562	15.12	17.8821	0.701184	0.615067	0.740061	1.03016	24 hpf	16	24 1	26.2018	14.9562	15.12	11.0818
		30.5614	14.9322		15.4414	0.217506	0.860051						30.9169	14.9322		15.7968	-0.104706	1.07528						33.9578	14.9322		18.8378	0.565621	0.675665						32.5909	14.9322		17.4708	0.289884	0.817968						26.7075	14.9322		11.5875
		31.1744	15.4716		16.0544	0.830472	0.562345						30.9473	15.4716		15.8273	-0.0742611	1.05282						33.987	15.4716		18.867	0.594803	0.662135						32.6463	15.4716		17.5263	0.345292	0.787149						26.7018	15.4716		11.5818
17	24 2	29.2051	14.2654	14.3852	14.8199	-0.403976	1.32315	1.22332			17	24 2	30.5541	14.2654	14.3852	16.1689	0.267339	0.830851	0.857563			17	24 2	31.8361	14.2654	14.3852	17.4509	-0.821301	1.767	1.4393			17	24 2	31.2363	14.2654	14.3852	16.8511	-0.329816	1.25685	1.2392			17	24 2	25.6771	14.2654	14.3852	11.2919
		29.4411	14.1473		15.0559	-0.167997	1.1235						30.7194	14.1473		16.3343	0.432702	0.740873						32.1217	14.1473		17.7366	-0.535633	1.44958						31.3563	14.1473		16.9711	-0.209851	1.15657						25.8639	14.1473		11.4787
			14.7428										30.2853	14.7428		15.9002	-0.00139311	1.00097						32.5182	14.7428		18.133	-0.139225	1.10131						31.183	14.7428		16.7978	-0.383144	1.30418						25.779	14.7428		11.3938
18	24 3	30.4717	15.2849	15.5071	14.9646	-0.259297	1.1969	1.02981			18	24 3	31.5603	15.2849	15.5071	16.0532	0.151617	0.900241	1.02139			18	24 3	33.6123	15.2849	15.5071	18.1052	-0.167024	1.12274	0.966448			18	24 3	32.4452	15.2849	15.5071	16.9381	-0.242863	1.18334	1.11121			18	24 3	26.6862	15.2849	15.5071	11.1791
		30.9441	15.2173		15.437	0.213043	0.862716						30.9988	15.2173		15.4917	-0.409886	1.32858						33.8927	15.2173		18.3855	0.113326	0.924455						32.3669	15.2173		16.8598	-0.321194	1.24936						27.1554	15.2173		11.6482
			16.0191										31.6682	16.0191		16.1611	0.259535	0.835357						34.0102	16.0191		18.503	0.230822	0.852149						32.8386	16.0191		17.3315	0.150508	0.900933						26.8914	16.0191		11.3843
19	24.5 1	30.4012	15.3375	15.637	14.7643	-0.459652	1.37521	1.1649	3.32409	24.5 hpf	19	24.5 1	30.9321	15.3375	15.637	15.2951	-0.606423	1.52248	1.39996	1.31736	24.5 hpf	19	24.5 1	34.7981	15.3375	15.637	19.1611	0.888897	0.540027	0.673268	0.718775	24.5 hpf	19	24.5 1	32.7389	15.3375	15.637	17.102	-0.0789896	1.05628	1.21137	1.0322	24.5 hpf	19	24.5 1	27.1822	15.3375	15.637	11.5453
		30.9279	15.6887		15.291	0.06706	0.954581						30.8892	15.6887		15.2523	-0.649294	1.5684						34.8338	15.6887		19.1968	0.924592	0.52683						32.5303	15.6887		16.8934	-0.287577	1.22059						26.7865	15.6887		11.1495
			15.8846										31.3892	15.8846		15.7523	-0.149279	1.10901						33.9787	15.8846		18.3417	0.069531	0.952948						32.3772	15.8846		16.7403	-0.440692	1.35725						26.8555	15.8846		11.2186
20	24.5 2	27.7223		15.3578	12.3645	-2.85937	7.25696	7.14921			20	24.5 2	27.7878		15.3578	12.43	-3.47155	11.0928				20	24.5 2	36.7261		15.3578	21.3683	3.09609	0.116946				20	24.5 2	32.805		15.3578	17.4473	0.266294	0.831452	0.741071			20	24.5 2	26.9867		15.3578	11.629
		27.9681	15.4247		12.6104	-2.61355	6.12009						27.9955	15.4247		12.6377	-3.26385	9.60546						37.2906	15.4247		21.9328	3.6606	0.0790767						32.9116	15.4247		17.5538	0.372885	0.772237						27.1567	15.4247		11.7989
		27.569	15.2908		12.2112	-3.01267	8.07057						28.007	15.2908		12.6492	-3.25235	9.52915							15.2908		-15.3578	-33.63							33.2295	15.2908		17.8717	0.690771	0.619523						27.2059	15.2908		11.8482
21	24.5 3	29.3476	15.1519	14.9212	14.4264	-0.797498	1.73808	1.65816			21	24.5 3	30.5519	15.1519	14.9212	15.6307	-0.27085	1.20652	1.23476			21	24.5 3	33.8012	15.1519	14.9212	18.88	0.607818	0.656188	0.764281			21	24.5 3	31.9349	15.1519	14.9212	17.0137	-0.167259	1.12292	1.14414			21	24.5 3	25.7411	15.1519	14.9212	10.82
		29.8451	14.8729		14.9239	-0.300012	1.23115						30.4439	14.8729		15.5227	-0.378844	1.3003						33.0635	14.8729		18.1423	-0.129876	1.0942						32.1102	14.8729		17.189	0.00808758	0.99441						25.6816	14.8729		10.7604
		29.1413	14.7388		14.2201	-1.00378	2.00525						30.5628	14.7388		15.6416	-0.25998	1.19746						34.0758	14.7388		19.1546	0.882423	0.542456						31.707	14.7388		16.7858	-0.395162	1.31509						25.8384	14.7388		10.9172
22	25 1	28.7162	14.9088	14.6731	14.0431	-1.1808	2.26703	2.29317	1.89272	25 hpf	22	25 1	29.4543	14.9088	14.6731	14.7811	-1.12043	2.17411	2.14062	1.61609	25 hpf	22	25 1	35.9942	14.9088	14.6731	21.321	3.04882	0.120841	0.126794	0.177556	25 hpf	22	25 1	32.9524	14.9088	14.6731	18.2793	1.09831	0.467063	0.509425	0.657246	25 hpf	22	25 1	26.9771	14.9088	14.6731	12.304
		28.6573	14.8275		13.9842	-1.2397	2.3615						29.3575	14.8275		14.6843	-1.21722	2.32499						35.9708	14.8275		21.2976	3.02542	0.122817						32.9577	14.8275		18.2846	1.1036	0.465353						26.5932	14.8275		11.92
		28.7265	14.2831		14.0534	-1.17055	2.25098						29.6315	14.2831		14.9584	-0.943189	1.92277						35.816	14.2831		21.1429	2.87066	0.136724						32.601	14.2831		17.9279	0.746954	0.59586						26.9561	14.2831		12.283
24	25 3	30.4687	15.9637	15.7117	14.7569	-0.466987	1.38222	1.49226			24	25 3	31.6355	15.9637	15.7117	15.9237	0.0221894	0.984737	1.09155			24	25 3	36.5539	15.9637	15.7117	20.8422	2.56995	0.16841	0.228318			24	25 3	33.2313	15.9637	15.7117	17.5196	0.338595	0.790811	0.805067			24	25 3	26.9337	15.9637	15.7117	11.2219
		30.5545	15.7812		14.8428	-0.381114	1.30235						31.5354	15.7812		15.8237	-0.0778721	1.05546						35.9193	15.7812		20.2076	1.93536	0.261456						33.3863	15.7812		17.6746	0.493605	0.710248						27.1876	15.7812		11.4759
		30.0939	15.3902		14.3822	-0.841752	1.79223						31.3094	15.3902		15.5977	-0.303881	1.23446						35.9549	15.3902		20.2431	1.97094	0.255087						33.0222	15.3902		17.3105	0.129508	0.914143						26.8869	15.3902		11.1752
25	26 1	26.1898	14.648	14.3672	11.8226	-3.40126	10.5653	10.1491	6.99186	26 hpf	25	26 1	27.012	14.648	14.3672	12.6448	-3.25673	9.55812	8.93934	7.57005	26 hpf	25	26 1	34.6968	14.648	14.3672	20.3297	2.05745	0.24024	0.316982	0.659836	26 hpf	25	26 1	32.0593	14.648	14.3672	17.6921	0.511129	0.701673	0.68101	0.822523	26 hpf	25	26 1	26.6616	14.648	14.3672	12.2945
	*	26.3956	14.7387		12.0285	-3.19545	9.16062					*	27.1796	14.7387		12.8124	-3.08917	8.51005					*	34.5496	14.7387		20.1825	1.91024	0.266048					*	32.1186	14.7387		17.7514	0.570463	0.673401					*	26.6593	14.7387		12.2921
		26.1687	13.7148		11.8015	-3.42242	10.7214						27.1395	13.7148		12.7723	-3.12926	8.74986						33.8086	13.7148		19.4414	1.16923	0.444659						32.1303	13.7148		17.7631	0.582171	0.667958						26.47	13.7148		12.1028
26	26 2	27.6859	14.4339	14.5159	13.1699	-2.05397	4.15246	4.22566			26	26 2	28.1969	14.4339	14.5159	13.681	-2.22057	4.66077	5.22355			26	26 2	33.1183	14.4339	14.5159	18.6024	0.330175	0.79544	0.865457			26	26 2	31.6164	14.4339	14.5159	17.1004	-0.0805145	1.0574	1.0519			26	26 2	26.3585	14.4339	14.5159	11.8425
		27.765	14.5979		13.249	-1.97487	3.93093						27.9629	14.5979		13.447	-2.45455	5.48141						33.2558	14.5979		18.7399	0.467672	0.723131						31.9391	14.5979		17.4232	0.242241	0.845431						26.4458	14.5979		11.9299
		27.5402			13.0243	-2.19962	4.59358						27.9506			13.4347	-2.46688	5.52846						32.68			18.1641	-0.108092	1.0778						31.3717			16.8557	-0.325231	1.25287						26.5463			12.0303
27	26 3	27.3702	14.827	14.8605	12.5097	-2.7142	6.56231	6.60083			27	26 3	27.8092	14.827	14.8605	12.9487	-2.95285	7.74279	8.54725			27	26 3	33.6528	14.827	14.8605	18.7923	0.520099	0.697324	0.797068			27	26 3	32.5356	14.827	14.8605	17.6751	0.494106	0.710001	0.734661			27	26 3	26.7272	14.827	14.8605	11.8667
		27.5108	14.894		12.6503	-2.57364	5.95311						27.6266	14.894		12.7661	-3.13548	8.78769						33.2898	14.894		18.4293	0.157123	0.896812						32.3713	14.894		17.5108	0.329819	0.795636						26.8506	14.894		11.9901
		27.2191			12.3586	-2.86534	7.28706						27.5744			12.7139	-3.18765	9.11126									-14.8605	-33.1327							32.5594			17.699	0.51799	0.698344						26.8774			12.0169
28	28 1	28.0966	14.7386	14.7638	13.3328	-1.89113	3.70925	3.71655	3.21867	hpf	28	28 1	28.1443	14.7386	14.7638	13.3805	-2.5211	5.74018	5.91703	6.43885	hpf	28	28 1	35.2109	14.7386	14.7638	20.447	2.17482	0.22147	0.183485	0.722979	hpf	28	28 1	31.9624	14.7386	14.7638	17.1986	0.0175991	0.987875	0.94604	1.04626	hpf	28	28 1	26.7169	14.7386	14.7638	11.953
		28.0695	14.7891		13.3057	-1.91821	3.77955						27.9606	14.7891		13.1967	-2.70481	6.51972						35.817	14.7891		21.0531	2.7809	0.145501						31.9244	14.7891		17.1605	-0.0204125	1.01425						26.4968	14.7891		11.7329
		28.1156			13.3517	-1.87219	3.66087						28.2083			13.4444	-2.45711	5.49117									-14.7638	-33.0361							32.2032			17.4394	0.258434	0.835995						26.7932			12.0293
29	28 2	28.6922	15.4185	15.3575	13.3347	-1.8892	3.70429	3.77912			29	28 2	27.7309	15.4185	15.3575	12.3734	-3.52817	11.5368	11.2796			29	28 2	33.3693	15.4185	15.3575	18.0118	-0.260406	1.19782	1.30163			29	28 2	31.8005	15.4185	15.3575	16.443	-0.737944	1.6678	1.23395			29	28 2	26.352	15.4185	15.3575	10.9945
		28.4444	15.3502		13.0869	-2.13701	4.39851						27.726	15.3502		12.3685	-3.53303	11.5757						33.2945	15.3502		17.937	-0.335197	1.26155						32.5075	15.3502		17.15	-0.0309819	1.02171						26.2775	15.3502		10.92
		28.8878	15.3037		13.5303	-1.69358	3.23458						27.8359	15.3037		12.4785	-3.4231	10.7264						33.0981	15.3037		17.7406	-0.531605	1.44554						32.5208	15.3037		17.1633	-0.0176839	1.01233						26.1911	15.3037		10.8336
30	28 3	28.0328		14.1715	13.8613	-1.36259	2.57147	2.16034			30	28 3	29.0221		14.1715	14.8506	-1.05096	2.0719	2.11988			30	28 3	32.8443		14.1715	18.6728	0.400551	0.757569	0.683817			30	28 3	30.9806		14.1715	16.8091	-0.371823	1.29399	0.958797			30	28 3	25.5457		14.1715	11.3741
		28.4309	14.1345		14.2594	-0.964528	1.95143						28.9568	14.1345		14.7853	-1.11622	2.16778						32.8266	14.1345		18.6551	0.382923	0.766882						31.7088	14.1345		17.5373	0.356357	0.781135						25.7224	14.1345		11.5509
		28.4259	14.2085		14.2544	-0.969485	1.95814						28.989	14.2085		14.8175	-1.08404	2.11996						33.3678	14.2085		19.1963	0.924126	0.527						31.6721	14.2085		17.5006	0.319642	0.801269						25.2048	14.2085		11.0333
31	30 1	28.9156		14.8931	14.0225	-1.20142	2.29965	1.95783	2.04321	30 hpf	31	30 1	29.8143		14.8931	14.9212	-0.980363	1.97296	2.10854	2.21376	30 hpf	31	30 1	33.4535		14.8931	18.5604	0.288191	0.818928	0.862948	0.724346	30 hpf	31	30 1	31.9404		14.8931	17.0473	-0.133662	1.09708	1.38698	1.18732	30 hpf	31	30 1	25.4479		14.8931	10.5549
		29.2796	14.8576		14.3865	-0.837363	1.78678						29.5553	14.8576		14.6622	-1.23934	2.36091						33.2678	14.8576		18.3748	0.102552	0.931384						31.6154	14.8576		16.7223	-0.458615	1.37422						25.8174	14.8576		10.9244
		29.2794	14.9285		14.3863	-0.837585	1.78706						29.8006	14.9285		14.9075	-0.994038	1.99175						33.4193	14.9285		18.5263	0.254061	0.838533						31.3173	14.9285		16.4242	-0.756726	1.68965						25.8567	14.9285		10.9636
32	30 2	29.4158		15.2382	14.1775	-1.04637	2.06533	1.75459			32	30 2	30.4249		15.2382	15.1867	-0.714887	1.64135	1.72138			32	30 2	34.5304		15.2382	19.2922	1.01999	0.493121	0.508057			32	30 2	31.9798		15.2382	16.7416	-0.439405	1.35604	1.20005			32	30 2	26.4829		15.2382	11.2447
		29.7003	15.2106		14.4621	-0.761787	1.69559						30.3314	15.2106		15.0932	-0.808383	1.75125						34.6835	15.2106		19.4452	1.17302	0.443491						32.06	15.2106		16.8218	-0.359182	1.2827						26.2233	15.2106		10.9851
		29.8744	15.2659		14.6362	-0.587707	1.50286						30.3148	15.2659		15.0765	-0.825006	1.77154						34.2776	15.2659		19.0394	0.767194	0.587559						32.476	15.2659		17.2378	0.0567917	0.9614						26.7345	15.2659		11.4963
33	30 3	27.9601	13.9434	14.2199	13.7403	-1.48363	2.79651	2.4172			33	30 3	28.6605	13.9434	14.2199	14.4406	-1.46096	2.75291	2.81136			33	30 3	32.6109	13.9434	14.2199	18.391	0.118811	0.920946	0.802032			33	30 3	31.6296	13.9434	14.2199	17.4098	0.228803	0.853343	0.974928			33	30 3	25.6186	13.9434	14.2199	11.3988
		28.2794	14.2324		14.0595	-1.1644	2.24139						28.5268	14.2324		14.3069	-1.59463	3.02017						32.5685	14.2324		18.3487	0.0764528	0.948387						31.4096	14.2324		17.1897	0.0087542	0.99395						25.67	14.2324		11.4501
		28.2973	14.4838		14.0775	-1.14645	2.21369						28.7095	14.4838		14.4896	-1.41196	2.66099						33.3897	14.4838		19.1698	0.897639	0.536764						31.2932	14.4838		17.0733	-0.107676	1.07749						25.6388	14.4838		11.419
[truncated: 16 more columns]
