# Supplementary material for: Variable paralog expression underlies phenotype variation
Source: eLife journal article supplement (doi:10.7554/elife.79247), 2022-09-22
Supplement: supp [file elife-79247-supp-v1.zip › elife_poa_e79247_Figure_4_source_data_2.xlsx]

## Sheet: Sheet1
PCR Date	2022-06-11		Expt.:	28 hpf								PCR Date	2022-06-11		Expt.:	28 hpf								PCR Date	2022-06-11		Expt.:	28 hpf								PCR Date	2022-06-11		Expt.:	28 hpf								PCR Date	2022-06-11
		CT	CT	Mean										CT	CT	Mean										CT	CT	Mean										CT	CT	Mean
Sample	Treatment	mef2ca	18s	CT 18S	DCT	DDCT	2-DDCT	Mean				Sample	Treatment	mef2b	18s	CT 18S	DCT	DDCT	2-DDCT	Mean				Sample	Treatment	mef2aa	18s	CT 18S	DCT	DDCT	2-DDCT	Mean				Sample	Treatment	mef2ab	18s	CT 18S	DCT	DDCT	2-DDCT	Mean				Sample	Treatment
	ab	29.7557	18.9477	18.8378	10.9179	0.278455	0.824474	0.828898	Low	1.32107			ab	29.9558	18.9477	18.8378	11.118	0.0394374	0.973034	1.21992	Low	1.03476			ab	27.5325	18.9477	18.8378	8.69472	-0.603376	1.51927	1.15084	Low	1.01735			ab	22.8184	18.9477	18.8378	3.98059	0.0124182	0.991429	1.01181	Low	1.0037			ab
	WT 1	29.6899	18.7428		10.8521	0.212702	0.862919		WT				WT 1	29.1757	18.7428		10.3378	-0.740689	1.67097		WT				WT 1	28.2878	18.7428		9.44999	0.151896	0.900067		WT				WT 1	22.7891	18.7428		3.95127	-0.016894	1.01178		WT				WT 1
	28 hpf	29.8004	18.8229		10.9626	0.323188	0.799302		28 hpf				28 hpf	29.8938	18.8229		11.056	-0.0225399	1.01575		28 hpf				28 hpf	28.0888	18.8229		9.25099	-0.0471057	1.03319		28 hpf				28 hpf	22.7602	18.8229		3.92242	-0.0457522	1.03222		28 hpf				28 hpf
	ab	30.6833	18.8778	18.8403	11.843	1.20361	0.434187	0.450427					ab	29.9928	18.8778	18.8403	11.1525	0.0739537	0.950031	0.828637					ab	28.505	18.8778	18.8403	9.66463	0.366542	0.775639	0.847439					ab	22.5353	18.8778	18.8403	3.695	-0.273168	1.20846	1.073					ab
	WT 2	30.6515	18.8054		11.8112	1.17181	0.443865						WT 2	30.0129	18.8054		11.1725	0.0940247	0.936905						WT 2	28.312	18.8054		9.47169	0.173598	0.886629						WT 2	22.8675	18.8054		4.02718	0.0590098	0.959923						WT 2
	28 hpf	30.5591	18.8377		11.7188	1.07939	0.47323						28 hpf	30.6583	18.8377		11.818	0.739435	0.598974						28 hpf	28.3228	18.8377		9.48244	0.184342	0.88005						28 hpf	22.7372	18.8377		3.89691	-0.0712544	1.05063						28 hpf
	ab	27.8582	18.6251	18.6589	9.19926	-1.44015	2.71348	2.68388					ab	29.9357	18.6251	18.6589	11.2768	0.198268	0.871596	1.05574					ab	27.8575	18.6251	18.6589	9.19854	-0.0995544	1.07144	1.05376					ab	22.7053	18.6251	18.6589	4.04637	0.078206	0.947235	0.92629					ab
	WT 3	27.8111	18.5802		9.15212	-1.48729	2.80362						WT 3	29.698	18.5802		11.0391	-0.0394471	1.02772						WT 3	27.9194	18.5802		9.26044	-0.0376552	1.02644						WT 3	22.8289	18.5802		4.16995	0.201781	0.869476						WT 3
	28 hpf	27.9566	18.7716		9.29769	-1.34172	2.53453						28 hpf	29.395	18.7716		10.7361	-0.342443	1.2679						28 hpf	27.8684	18.7716		9.20941	-0.0886863	1.0634						28 hpf	22.6828	18.7716		4.02382	0.0556536	0.962158						28 hpf
	ab	25.8759	17.586	17.7425	8.13341	-2.506	5.68044	6.24822	High	4.01731			ab	29.8446	17.586	17.7425	12.1022	1.02363	0.491876	0.468933	High	0.413089			ab	24.3087	17.586	17.7425	6.56627	-2.73182	6.64292	6.61678	High	9.5707			ab	25.4445	17.586	17.7425	7.702	3.73383	0.0751632	0.0791075	High	0.155093			ab
	WT 1	25.5966	17.6437		7.85412	-2.78528	6.89373		WT				WT 1	29.7648	17.6437		12.0224	0.943876	0.519834		WT				WT 1	24.3979	17.6437		6.65543	-2.64266	6.24482		WT				WT 1	25.2381	17.6437		7.49563	3.52746	0.0867219		WT				WT 1
	28 hpf	25.7565	17.9977		8.01402	-2.62538	6.17048		28 hpf				28 hpf	30.1607	17.9977		12.4183	1.33975	0.395088		28 hpf				28 hpf	24.2409	17.9977		6.49847	-2.79962	6.96259		28 hpf				28 hpf	25.4392	17.9977		7.69674	3.72858	0.0754374		28 hpf				28 hpf
	ab	27.9798	18.4845	18.8692	9.11063	-1.52878	2.88542	2.84099					ab	31.197	18.4845	18.8692	12.3279	1.24935	0.420638	0.370333					ab	24.9344	18.4845	18.8692	6.06528	-3.23282	9.40101	8.83652					ab	25.9563	18.4845	18.8692	7.08713	3.11896	0.115106	0.119725					ab
	WT 2	27.8789	18.9183		9.00975	-1.62966	3.09441						WT 2	31.5914	18.9183		12.7222	1.64373	0.320028						WT 2	25.0024	18.9183		6.13327	-3.16482	8.96821						WT 2	25.8351	18.9183		6.96598	2.99782	0.125189						WT 2
	28 hpf	28.162	19.2046		9.29279	-1.34662	2.54315						28 hpf		19.2046										28 hpf	25.1422	19.2046		6.273	-3.02509	8.14035						28 hpf	25.9098	19.2046		7.04059	3.07243	0.11888						28 hpf
	ab	28.7226	19.7937	19.9609	8.76166	-1.87775	3.67501	2.96272					ab	31.9851	19.7937	19.9609	12.0242	0.945653	0.519195	0.400002					ab	25.6307	19.7937	19.9609	5.66979	-3.62831	12.366	13.2588					ab	25.8177	19.7937	19.9609	5.85678	1.88861	0.270067	0.266445					ab
	WT 3	29.1568	19.8815		9.19587	-1.44354	2.71988						WT 3	32.6809	19.8815		12.72	1.6415	0.320522						WT 3	25.4374	19.8815		5.47647	-3.82162	14.1391						WT 3	25.8668	19.8815		5.90589	1.93772	0.261029						WT 3
	28 hpf	29.2823	20.2075		9.32137	-1.31804	2.49327						28 hpf	32.5122	20.2075		12.5513	1.47277	0.36029						28 hpf	25.5288	20.2075		5.56786	-3.73023	13.2712						28 hpf	25.8275	20.2075		5.86657	1.8984	0.26824						28 hpf
[truncated: 21 more columns]
