# Supplementary material for: Variable paralog expression underlies phenotype variation
Source: eLife journal article supplement (doi:10.7554/elife.79247), 2022-09-22
Supplement: supp [file elife-79247-supp-v1.zip › elife_poa_e79247_Figure_4_source_data_3.xlsx]

## Sheet: Sheet1
PCR Date	2018-06-01		Expt.:	28 hpf								PCR Date	2018-06-01		Expt.:	28 hpf									PCR Date	2018-06-01		Expt.:	28 hpf								PCR Date	2018-06-01		Expt.:	28 hpf								PCR Date
		CT	CT	Mean										CT	CT	Mean											CT	CT	Mean										CT	CT	Mean
Sample	Treatment	mef2ca	18s	CT 18S	DCT	DDCT	2-DDCT	Mean				Sample	Treatment	mef2b	18s	CT 18S	DCT	DDCT	2-DDCT	Mean					Sample	Treatment	mef2aa	18s	CT 18S	DCT	DDCT	2-DDCT	Mean				Sample	Treatment	mef2ab	18s	CT 18S	DCT	DDCT	2-DDCT	Mean				Sample
1	Low	27.7303	20.0058	19.9613	7.76894	-1.22855	2.34331	2.44179	Low	2.59881		1	Low	31.3955	20.0058	19.9613	11.4342	-1.02835	2.03969	2.15653	Low	2.56939			1	Low	29.2943	20.0058	19.9613	9.33298	-0.541223	1.45521	1.5712	Low	1.71428		1	Low	25.7785	20.0058	19.9613	5.81719	-3.4539	10.9579	10.863	Low	9.93094		1
	WT 1	27.7565	19.9163		7.79522	-1.20227	2.30102		WT				WT 1	31.1605	19.9163		11.1992	-1.26331	2.40046		WT					WT 1	29.2601	19.9163		9.29878	-0.575424	1.49012		WT				WT 1	25.7722	19.9163		5.81091	-3.46018	11.0057		WT
	28 hpf	27.536	19.9619		7.57469	-1.4228	2.68106		28 hpf				28 hpf	31.4028	19.9619		11.4415	-1.02107	2.02943		28 hpf					28 hpf	29.0132	19.9619		9.05187	-0.822338	1.76827		28 hpf				28 hpf	25.823	19.9619		5.86167	-3.40943	10.6253		28 hpf
2	Low	27.4014	19.8629	19.8745	7.5269	-1.47059	2.77135	3.01812				2	Low	31.0782	19.8629	19.8745	11.2036	-1.25892	2.39317	2.55156					2	Low	29.283	19.8629	19.8745	9.40841	-0.465795	1.38108	1.44586				2	Low	25.9898	19.8629	19.8745	6.11529	-3.1558	8.91231	8.16021				2
	WT 2	27.2851	19.9623		7.41054	-1.58695	3.00414						WT 2	31.2431	19.9623		11.3686	-1.09394	2.13457							WT 2	29.2591	19.9623		9.3846	-0.489606	1.40406						WT 2	26.2041	19.9623		6.32952	-2.94158	7.68251
	28 hpf	27.1588	19.7984		7.28429	-1.7132	3.27888						28 hpf	30.6923	19.7984		10.8178	-1.64475	3.12695							28 hpf	29.1142	19.7984		9.23967	-0.634538	1.55244						28 hpf	26.1664	19.7984		6.29184	-2.97926	7.8858
3	Low	27.5314	20.1691	20.2491	7.28224	-1.71525	3.28353	3.18729				3	Low	30.7646	20.1691	20.2491	10.5155	-1.94702	3.85578	3.38787					3	Low	29.0293	20.1691	20.2491	8.78021	-1.09399	2.13464	2.06727				3	Low	26.5822	20.1691	20.2491	6.33312	-2.93798	7.66336	8.75627				3
	WT 3	27.6242	20.2826		7.37507	-1.62242	3.07892						WT 3	31.2758	20.2826		11.0267	-1.43587	2.70545							WT 3	29.0018	20.2826		8.75269	-1.12152	2.17576						WT 3	26.4577	20.2826		6.20854	-3.06256	8.35451
	28 hpf	27.5688	20.2957		7.31968	-1.67781	3.19941						28 hpf	30.8627	20.2957		10.6136	-1.84895	3.60237							28 hpf	29.2039	20.2957		8.95474	-0.91946	1.89141						28 hpf	26.1625	20.2957		5.91341	-3.35768	10.2509
4	Low	28.3573	20.1031	20.049	8.30828	-0.689215	1.61241	1.74804				4	Low	31.2141	20.1031	20.049	11.1651	-1.29744	2.45792	2.18161					4	Low	29.176	20.1031	20.049	9.12696	-0.747244	1.67858	1.7728				4	Low	25.7836	20.1031	20.049	5.7346	-3.5365	11.6036	11.9443				4
	WT 4	28.207	20.067		8.15803	-0.839462	1.78938						WT 4	31.3947	20.067		11.3457	-1.11688	2.16877							WT 4	28.9963	20.067		8.94734	-0.926861	1.90114						WT 4	25.6389	20.067		5.58991	-3.68118	12.8276
	28 hpf	28.1649	19.9769		8.11595	-0.88154	1.84234						28 hpf	31.5718	19.9769		11.5228	-0.939702	1.91813							28 hpf	29.1252	19.9769		9.07622	-0.797982	1.73867						28 hpf	25.8089	19.9769		5.75991	-3.51119	11.4018
5	High	29.5708	20.3823	20.4086	9.16225	0.164764	0.892074	0.97629	High	1.11666		5	High	33.7523	20.3823	20.4086	13.3437	0.881142	0.542938	0.947448	High	1.0466			5	High	30.2971	20.3823	20.4086	9.88851	0.0143061	0.990133	0.980724	High	1.01135		5	High	29.3369	20.3823	20.4086	8.92838	-0.342716	1.26814	1.15204	High	1.03989		5
	WT 1	29.2916	20.4454		8.88305	-0.114439	1.08255		WT				WT 1	32.2549	20.4454		11.8463	-0.616211	1.53284		WT					WT 1	30.2015	20.4454		9.79289	-0.0813112	1.05798		WT				WT 1	29.481	20.4454		9.07246	-0.198633	1.14761		WT
	28 hpf	29.4736	20.398		9.06506	0.0675731	0.954242		28 hpf				28 hpf	33.2546	20.398		12.8461	0.383526	0.766562		28 hpf					28 hpf	30.4443	20.398		10.0358	0.161557	0.89406		28 hpf				28 hpf	29.6226	20.398		9.21399	-0.0571022	1.04037		28 hpf
6	High	29.0823	20.505	20.4755	8.60679	-0.390705	1.31103	1.40239				6	High	32.7303	20.505	20.4755	12.2548	-0.207719	1.15486	1.2653					6	High	30.0731	20.505	20.4755	9.59759	-0.276615	1.21135	1.13278				6	High	29.252	20.505	20.4755	8.77652	-0.494575	1.40891	1.2973				6
	WT 2	29.0792	20.4236		8.60375	-0.393745	1.3138						WT 2	32.1964	20.4236		11.7209	-0.741628	1.67206							WT 2	30.3578	20.4236		9.88227	0.00806967	0.994422						WT 2	29.3856	20.4236		8.91014	-0.360957	1.28428
	28 hpf	28.8109	20.4978		8.33542	-0.662069	1.58235						28 hpf	32.9835	20.4978		12.508	0.0454547	0.968984							28 hpf	30.0956	20.4978		9.62013	-0.254069	1.19257						28 hpf	29.4851	20.4978		9.00962	-0.261476	1.1987
7	High	31.219	20.9026	20.8358	10.3832	1.38572	0.382698	0.455899				7	High	36.7726	20.9026						didn’t work here, not counting. Was too low				7	High	31.0743	20.9026	20.8358	10.2385	0.364249	0.776873	0.813184				7	High	30.4391	20.9026	20.8358	9.60331	0.332221	0.794313	0.760331				7
	WT 3	30.9957	20.8074		10.1599	1.16238	0.446776						WT 3	37.0074	20.8074											WT 3	30.8759	20.8074		10.0401	0.165882	0.891383						WT 3	30.4471	20.8074		9.61129	0.340198	0.789933
	28 hpf	30.727	20.7973		9.89122	0.893727	0.538222						28 hpf		20.7973											28 hpf	31.0847	20.7973		10.2488	0.374642	0.771297						28 hpf	30.6282	20.7973		9.79239	0.521295	0.696746
8	High	29.1293	20.8188	20.7231	8.40611	-0.591376	1.50668	1.63207				8	High	33.0822	20.8188	20.7231	12.3591	-0.103445	1.07434	0.927053					8	High	30.3188	20.8188	20.7231	9.59562	-0.278579	1.213	1.11873				8	High	30.6963	20.8188	20.7231	9.97318	0.702082	0.614685	0.949874				8
	WT 4	28.9373	20.5964		8.21417	-0.783322	1.72109						WT 4	33.5446	20.5964		12.8214	0.358881	0.779769							WT 4	30.4536	20.5964		9.73048	-0.143723	1.10475						WT 4	30.3573	20.5964		9.6342	0.36311	0.777487
	28 hpf	28.9821	20.7543		8.25899	-0.738505	1.66845						28 hpf		20.7543											28 hpf	30.5429	20.7543		9.8198	-0.0544081	1.03843						28 hpf	29.4508	20.7543		8.72765	-0.543446	1.45745
[truncated: 21 more columns]
