# Supplementary material for: Variable paralog expression underlies phenotype variation
Source: eLife journal article supplement (doi:10.7554/elife.79247), 2022-09-22
Supplement: supp [file elife-79247-supp-v1.zip › elife_poa_e79247_Figure_4_source_data_4.xlsx]

## Sheet: Sheet1
		CT	CT	Mean										CT	CT	Mean
Sample	Treatment	18s	eef1a1l1	CT 18S	DCT	DDCT	2-DDCT	Mean				Sample	Treatment	18s	rspx	CT 18S	DCT	DDCT	2-DDCT	Mean
1	Low	20.0058	13.7375	13.6769	6.32893	-0.114971	1.08295	1.11722	Low	1.00778		1	Low	20.0058	19.7197	19.6422	0.363577	0.0104863	0.992758	1.02417	Low	1.00685
	WT 1	19.9163	13.6605		6.23939	-0.204511	1.1523		WT				WT 1	19.9163	19.5915		0.274036	-0.0790542	1.05633		WT
	28 hpf	19.9619	13.6326		6.28503	-0.158878	1.11642		28 hpf				28 hpf	19.9619	19.6155		0.31967	-0.0334209	1.02344		28 hpf
2	Low	19.8629	13.5631	13.5784	6.28453	-0.159378	1.11681	1.10904				2	Low	19.8629	19.5453	19.7443	0.118636	-0.234454	1.17646	1.16828
	WT 2	19.9623	13.5945		6.38391	-0.0599957	1.04246						WT 2	19.9623	19.5261		0.218019	-0.135072	1.09815
	28 hpf	19.7984	13.5775		6.22005	-0.223856	1.16785						28 hpf	19.7984	20.1614		0.0541585	-0.298932	1.23023
3	Low	20.1691	13.5443	13.5386	6.63049	0.186586	0.878683	0.831931				3	Low	20.1691	19.654	19.6731	0.49603	0.142939	0.905672	0.857484
	WT 3	20.2826	13.5174		6.74393	0.300029	0.812236						WT 3	20.2826	19.6979		0.609473	0.256382	0.837185
	28 hpf	20.2957	13.5541		6.75707	0.313167	0.804873						28 hpf	20.2957	19.6673		0.622611	0.26952	0.829595
4	Low	20.1031	13.5895	13.5645	6.53859	0.09469	0.936473	0.972911				4	Low	20.1031	19.5985	19.662	0.441046	0.0879558	0.940855	0.977462
	WT 4	20.067	13.5636		6.50253	0.0586278	0.960177						WT 4	20.067	19.7449		0.404984	0.0518936	0.964669
	28 hpf	19.9769	13.5403		6.41239	-0.0315097	1.02208						28 hpf	19.9769	19.6427		0.314847	-0.0382439	1.02686
5	High	20.3823	14.3576	14.3268	6.05552	-0.388389	1.30893	1.28551	High	1.62014		5	High	20.3823	20.2655	20.2659	0.116325	-0.236766	1.17835	1.15726	High	1.39435
	WT 1	20.4454	14.2534		6.11869	-0.325214	1.25285		WT				WT 1	20.4454	20.278		0.1795	-0.173591	1.12786		WT
	28 hpf	20.398	14.3693		6.07123	-0.372674	1.29475		28 hpf				28 hpf	20.398	20.2544		0.132039	-0.221051	1.16558		28 hpf
6	High	20.505	14.6501	14.6734	5.83157	-0.612337	1.52873	1.56082				6	High	20.505	20.6343	20.5765	-0.0714728	-0.424563	1.34217	1.37033
	WT 2	20.4236	14.6819		5.75023	-0.693674	1.6174						WT 2	20.4236	20.5144		-0.15281	-0.5059	1.42001
	28 hpf	20.4978	14.6883		5.82443	-0.619476	1.53632						28 hpf	20.4978	20.5807		-0.078612	-0.431703	1.34882
7	High	20.9026	15.5181	15.5081	5.39454	-1.04937	2.06962	2.16891				7	High	20.9026	21.2308	21.1721	-0.269507	-0.622598	1.53964	1.61351
	WT 3	20.8074	15.4839		5.29935	-1.14455	2.21078						WT 3	20.8074	21.1607		-0.364693	-0.717784	1.64465
	28 hpf	20.7973	15.5223		5.28924	-1.15466	2.22632						28 hpf	20.7973	21.1249		-0.374802	-0.727893	1.65622
8	High	20.8188	14.8755	14.8274	5.99135	-0.452558	1.36846	1.46533				8	High	20.8188	20.9512	20.8893	-0.0705891	-0.42368	1.34134	1.43629
	WT 4	20.5964	14.8067		5.76897	-0.67493	1.59652						WT 4	20.5964	20.8473		-0.292961	-0.646052	1.56488
	28 hpf	20.7543	14.7999		5.92688	-0.51702	1.431						28 hpf	20.7543	20.8695		-0.135052	-0.488142	1.40264
