# Supplementary material for: Variable paralog expression underlies phenotype variation
Source: eLife journal article supplement (doi:10.7554/elife.79247), 2022-09-22
Supplement: supp [file elife-79247-supp-v1.zip › elife_poa_e79247_Figure_5_source_data_1.xlsx]

## Sheet: Sheet1
WT;WT	WT;WT				WT;Het	WT;Het				WT;Mut	WT;Mut				Het;WT	Het;WT				Het;Het	Het;Het				Het;Mut	Het;Mut				Mut;WT	Mut;WT				Mut;Het	Mut;Het
Left Symplectic	Right Symplectic	Total:	Absolute Value		Left Symplectic	Right Symplectic	Total:	Absolute Value		Left Symplectic	Right Symplectic	Total:	Absolute Value		Left Symplectic	Right Symplectic	Total:	Absolute Value		Left Symplectic	Right Symplectic	Total:	Absolute Value		Left Symplectic	Right Symplectic	Total:	Absolute Value		Left Symplectic	Right Symplectic	Total:	Average Value		Left Symplectic	Right Symplectic	Total:	Absolute Value
161	153	314	8		150	140.8	290.8	9.2		105	111.5	216.5	6.5		144.6	141.8	286.4	2.8		131.5	130.8	262.3	0.7		68.6	72.4	141	3.8		154	148.01	302.01	5.99		139.3	146	285.3	6.7
151	146	297	5		160	150	310	10		93.6	93.246	186.846	0.354		156.2	152.6	308.8	3.6		145.2	148.9	294.1	3.7		70.71	65.2	135.91	5.51		130.2	138.4	268.6	8.2		100.6	101.3	201.9	0.7
161	148	309	13		144	148.5	292.5	4.5		116.2	81.462	197.662	34.738		163.1	161.5	324.6	1.6		150.2	146.1	296.3	4.1		50.8	43.2	94	7.6		133	135.2	268.2	2.2		105.6	82.8	188.4	22.8
160	158	318	2		148	139.5	287.5	8.5		57.3	80.055	137.355	22.755		134.1	147.1	281.2	13		155.8	154.1	309.9	1.7		48.01	53.3	101.31	5.29		151	151	302	0		127.5	129.6	257.1	2.1
155	158	313	3		145	149	294	4		49.18	75.168	124.348	25.988		143.2	145.2	288.4	2		150	145	295	5		67.4	74	141.4	6.6		147	142.3	289.3	4.7		123.7	132.9	256.6	9.2
156	154	310	2												157.01	145.3	302.31	11.71		120	118.5	238.5	1.5		72	84	156	12		151	152.9	303.9	1.9		140.8	138.1	278.9	2.7
155	161	316	6																	156.2	149.8	306	6.4		49.4	43	92.4	6.4		132.7	135.9	268.6	3.2		50.05	96.23	146.28	46.18
153	154	307	1																	144.8	146.4	291.2	1.6		28.5	56.9	85.4	28.4							151.4	151.7	303.1	0.3
147	155	302	8																	146.8	151.5	298.3	4.7		40.2	53.8	94	13.6							126.4	126.6	253	0.2
160	160	320	0																	142.6	150.2	292.8	7.6		68.5	70.6	139.1	2.1							90.1	101.4	191.5	11.3
157	159	316	2																	156.7	144.4	301.1	12.3		35.7	68.6	104.3	32.9
158	156	314	2																	156.6	156.5	313.1	0.1		35.4	41.9	77.3	6.5
154	149	303	5																	155.8	156.2	312	0.4		65.8	47.8	113.6	18
154	160	314	6																	146.6	140.7	287.3	5.9		40.5	39.8	80.3	0.7
153	151	304	2																	150.5	150.7	301.2	0.2
158	160	318	2																	127.8	92.9	220.7	34.9
155	157	312	2																	135.2	145	280.2	9.8
157	154	311	3																	154	150.2	304.2	3.8
156	160	316	4																	145.3	140.6	285.9	4.7
151	152	303	1																	144.5	148.1	292.6	3.6
155	156	311	1																	145.7	131.5	277.2	14.2
148	149	297	1																	138.1	145.1	283.2	7
																				144	145.4	289.4	1.4
																				157.6	156.9	314.5	0.7
																				157.1	153.5	310.6	3.6
