# Supplementary material for: Variable paralog expression underlies phenotype variation
Source: eLife journal article supplement (doi:10.7554/elife.79247), 2022-09-22
Supplement: supp [file elife-79247-supp-v1.zip › elife_poa_e79247_Figure_6_source_data_1.xlsx]

## Sheet: Sheet1
Genotype: Mef2ca;Mef2d	Left Symplectic	Right Symplectic		Total:	DI:
WT;WT	162.585	163.427		326.012	0.842
WT;WT	164.275	158.909		323.184	5.366
WT;WT	137.508	149.105		286.613	11.597
WT;WT	149.414	153.847		303.261	4.433
WT;Het	153.858	151.566		305.424	2.292
WT;Het	142.357	148.78		291.137	6.423
WT;Het	144.322	152.712		297.034	8.39
WT;Het	149.148	154.419		303.567	5.271
WT;Het	149.114	152.186		301.3	3.072
WT;Het	147.443	148.691		296.134	1.248
WT;Het	152.185	151.167		303.352	1.018
WT;Het	154.384	159.262		313.646	4.878
WT;Het	143.209	142.606		285.815	0.603
WT;Het	151.243	145.955		297.198	5.288
WT;Mut	139.064	142.078		281.142	3.014
WT;Mut	154.969	151.179		306.148	3.79
Het;WT	155.562	146.643		302.205	8.919
Het;WT	147.374	140.72		288.094	6.654
Het;WT	153.537	159.911		313.448	6.374
Het;WT	147.367	141.683		289.05	5.684
Het;WT	150.566	140.258		290.824	10.308
Het;WT	152.704	155.697		308.401	2.993
Het;WT	151.087	146.22		297.307	4.867
Het;WT	138.296	151.73		290.026	13.434
Het;WT	138.3	140.576		278.876	2.276
Het;WT	145.442	146.525		291.967	1.083
Het;Het	138.969	143.296		282.265	4.327
Het;Het	153.497	148.839		302.336	4.658
Het;Het	150.903	139.263		290.166	11.64
Het;Het	148.744	147.019		295.763	1.725
Het;Het	139.779	135.12		274.899	4.659
Het;Het	143.673	131.777		275.45	11.896
Het;Het	136.198	139.419		275.617	3.221
Het;Het	145.303	149.72		295.023	4.417
Het;Het	142.592	127.13		269.722	15.462
Het;Het	146.501	108.463		254.964	38.038
Het;Het	155.89	148.393		304.283	7.497
Het;Het	150.475	147.009		297.484	3.466
Het;Mut	109.715	97.14		206.855	12.575
Het;Mut	140.009	149.457		289.466	9.448
Het;Mut	154.767	146.181		300.948	8.586
Het;Mut	146.682	156.664		303.346	9.982
Het;Mut	148.229	144.17		292.399	4.059
Het;Mut	131.131	145.368		276.499	14.237
Het;Mut	157.823	150.054		307.877	7.769
Het;Mut	156.605	145.611		302.216	10.994
Het;Mut	155.949	139.224		295.173	16.725
Mut;WT	84.823	81.502		166.325	3.321
Mut;WT	81.734	96.897		178.631	15.163
Mut;WT	88.876	97.194		186.07	8.318
Mut;WT	101.771	90.948		192.719	10.823
Mut;WT	76.589	79.32		155.909	2.731
Mut;WT	81.358	88.634		169.992	7.276
Mut;WT	64.988	78.684		143.672	13.696
Mut;WT	104.618	74.122		178.74	30.496
Mut;Het	90.194	66.577		156.771	23.617
Mut;Het	68.924	80.281		149.205	11.357
Mut;Het	64.593	89.667		154.26	25.074
Mut;Het	79.244	78.925		158.169	0.319
Mut;Het	78.643	72.913		151.556	5.73
Mut;Het	52.691	63.07		115.761	10.379
Mut;Het	61.15	76.405		137.555	15.255
Mut;Het	72.982	83.737		156.719	10.755
Mut;Het	86.203	95.15		181.353	8.947
Mut;Het	69.782	70.717		140.499	0.935
Mut;Het	72.731	78.292		151.023	5.561
Mut;Het	84.138	53.978		138.116	30.16
Mut;Mut	88.432	79.619		168.051	8.813
Mut;Mut	62.794	69.928		132.722	7.134
Mut;Mut	57.875	70.285		128.16	12.41
Mut;Mut	75.498	56.37		131.868	19.128
Mut;Mut	57.788	51.023		108.811	6.765
Mut;Mut	77.206	72.728		149.934	4.478
mut;wt	81.986	95.682		177.668	13.696
mut;mut	62.657	70.664		133.321	8.007
mut;mut	59.035	90.21		149.245	31.175
mut;mut	74.052	54.845		128.897	19.207
