# Supplementary material for: Variable paralog expression underlies phenotype variation
Source: eLife journal article supplement (doi:10.7554/elife.79247), 2022-09-22
Supplement: supp [file elife-79247-supp-v1.zip › elife_poa_e79247_Figure_7_source_data_1.xlsx]

## Sheet: Sheet1
Genotype	WT;WT	WT;WT				WT;Het	WT;Het				WT;Mut	WT;Mut				Het;WT	Het;WT				Het;Het	Het;Het				Het;Mut	Het;Mut				Mut;WT	Mut;WT				Mut;Het	Mut;Het				Mut;Mut	Mut;Mut
	Left Symplectic	Right Symplectic	Total:	Absolute Value		Left Symplectic	Right Symplectic	Total:	Absolute Value		Left Symplectic	Right Symplectic	Total:	Absolute Value		Left Symplectic	Right Symplectic	Total:	Absolute Value		Left Symplectic	Right Symplectic	Total:	Absolute Value		Left Symplectic	Right Symplectic	Total:	Absolute Value		Left Symplectic	Right Symplectic	Total:	Average Value		Left Symplectic	Right Symplectic	Total:	Absolute Value		Left Symplectic	Right Symplectic	Total:	Absolue Value
	140.738	139.645	280.383	1.093		142.802	147.35	290.152	4.548		142.164	137.247	279.411	4.917		121.686	140.055	261.741	18.369		147.686	150.228	297.914	2.542		150.228	146.53	296.758	3.698		85.595	57.996	143.591	27.599		85.163	68.043	153.206	17.12		76.013	44.96	120.973	31.053
	149.103	153.834	302.937	4.731		146.502	150.18	296.682	3.678		158.508	143.858	302.366	14.65		126.932	145.437	272.369	18.505		136.621	126.556	263.177	10.065		126.556	130.495	257.051	3.939		81.999	92.812	174.811	10.813		81.471	91.85	173.321	10.379		98.087	96.153	194.24	1.934
	133.794	149.171	282.965	15.377		150.21	142.9	293.11	7.3101		130.015	129.712	259.727	0.303		142.744	143.655	286.399	0.911		147.947	139.49	287.437	8.457		139.49	143.787	283.277	4.297		71.275	86.965	158.24	15.69		64.134	79.612	143.746	15.478		91.069	90.582	181.651	0.487
	142.343	138.249	280.592	4.094		143.402	139.392	282.794	4.01		151.553	150.906	302.459	0.647							127.947	149.565	277.512	21.618		149.565	129.473	279.038	20.092		79.886	69.626	149.512	10.26		110.822	103.248	214.07	7.574		111.426	101.525	212.951	9.901
						135.636	138.808	274.444	3.172		147.035	142.518	289.553	4.517							145.61	139.976	285.586	5.634		139.976	121.582	261.558	18.394		90.303	71.951	162.254	18.352		116.243	94.484	210.727	21.759		62.657	70.664	133.321	8.007
						136.433	130.237	266.67	6.196		148.606	145	293.606	3.606							136.772	144.36	281.132	7.588		144.36	160.039	304.399	15.679		84.127	80.652	164.779	3.475		90.272	98.586	188.858	8.314		59.035	90.21	149.245	31.175
						130.806	143.546	274.352	12.74		151.265	147.061	298.326	4.204							145.002	146.309	291.311	1.307		146.309	142.318	288.627	3.991		87.138	95.131	182.269	7.993		106.164	75.084	181.248	31.08		74.052	54.845	128.897	19.207
						148.108	128.611	276.719	19.497		138.061	147.905	285.966	9.844							127.431	134.78	262.211	7.349		134.78	143.394	278.174	8.614							83.046	89.424	172.47	6.378
						148.939	148.296	297.235	0.643																											93.336	94.791	188.127	1.455
						137.848	143.037	280.885	5.189																											62.635	86.146	148.781	23.511
						148.568	133.437	282.005	15.131																											69.998	85.116	155.114	15.118
						146.398	136.504	282.902	9.894																											83.263	93.697	176.96	10.434
						154.918	151.984	306.902	2.934																											98.096	75.708	173.804	22.388
						138.438	145.812	284.25	7.374																											69.596	67.774	137.37	1.822
																																				91.486	83.414	174.9	8.072
