# Supplementary material for: Variable paralog expression underlies phenotype variation
Source: eLife journal article supplement (doi:10.7554/elife.79247), 2022-09-22
Supplement: supp [file elife-79247-supp-v1.zip › elife_poa_e79247_Figure_8_source_data_1.xlsx]

## Sheet: Sheet1
mef2ca -/-, mef2aa +/+
L	R	L+R	L-R
68.219	98.096	166.315	29.877
59.007	71.95	130.957	12.943
70.237	94.85	165.087	24.613
58.119	72.671	130.79	14.552
77.874	78.462	156.336	0.588
65.007	97.898	162.905	32.891
63.314	50.442	113.756	12.872
123.383	87.547	210.93	35.836
mef2ca -/-, mef2aa +/-
L	R
74.75	74.467	149.217	0.283
56.879	59.45	116.329	2.571
70.292	46.989	117.281	23.303
57.989	83.572	141.561	25.583
54.206	57.314	111.52	3.108
57.749	56.219	113.968	1.53
91.238	48.949	140.187	42.289
75.2	70.301	145.501	4.899
60.021	75.361	135.382	15.34
54.94	63.869	118.809	8.929
68.492	47.143	115.635	21.349
72.074	36.572	108.646	35.502
63.175	66.717	129.892	3.542
72.557	65.275	137.832	7.282
67.285	84.549	151.834	17.264
92.617	53.469	146.086	39.148
73.197	103.897	177.094	30.7
89.985	69.351	159.336	20.634
91.88	65.546	157.426	26.334
mef2aa -/-, mef2ca -/-
103.052	47.88	150.932	55.172
67.766	100.476	168.242	32.71
71.97	89.335	161.305	17.365
46.999	58.626	105.625	11.627
92.923	97.292	190.215	4.369
90.56	101.689	192.249	11.129
70.947	82.994	153.941	12.047
79.514	72.419	151.933	7.095
72.256	84.014	156.27	11.758
88.405	62.554	150.959	25.851
59.414	66.19	125.604	6.776
mef2ca+/+, mef2aa +/+
L	R
145.537	135.742	281.279	9.795
157.288	156.074	313.362	1.214
148.197	140.872	289.069	7.325
164.928	159.17	324.098	5.758
144.429	154.257	298.686	9.828
160.138	166.194	326.332	6.056
161.49	153.007	314.497	8.483
mef2ca+/+, mef2aa-/-
L	R
153.654	159.332	312.986	5.678
152.115	160.877	312.992	8.762
147.792	142.876	290.668	4.916
166.006	164.24	330.246	1.766
156.469	162.602	319.071	6.133
152.997	163.787	316.784	10.79
129.822	156.299	286.121	26.477
165.839	163.708	329.547	2.131
160.773	151.687	312.46	9.086
165.037	147.83	312.867	17.207
160.42	153.591	314.011	6.829
mef2ca+/-, mef2aa-/-
L	R
141.413	158.639	300.052	17.226
161.869	161.779	323.648	0.09
142.339	148.713	291.052	6.374
149.606	173.12	322.726	23.514
142.587	134.67	277.257	7.917
146.039	117.986	264.025	28.053
151.196	111.97	263.166	39.226
165.213	142.534	307.747	22.679
164.721	151.307	316.028	13.414
156.142	148.349	304.491	7.793
147.246	143.749	290.995	3.497
149.12	159.341	308.461	10.221
mef2ca+/-, mef2aa+/+
L	R
158.085	166.776	324.861	8.691
149.585	150.376	299.961	0.791
165.646	152.94	318.586	12.706
155.244	136.509	291.753	18.735
161.077	155.282	316.359	5.795
151.157	146.802	297.959	4.355
159.492	154.637	314.129	4.855
166.021	160.788	326.809	5.233
155.538	136.456	291.994	19.082
156.064	149.601	305.665	6.463
164.382	158.621	323.003	5.761
145.617	142.194	287.811	3.423
mef2ca+/+, mef2aa+/-
L	R
167.774	171.377	339.151	3.603
151.063	163.583	314.646	12.52
157.081	154.287	311.368	2.794
154.103	163.214	317.317	9.111
164.505	172.008	336.513	7.503
170.818	159.884	330.702	10.934
166.375	155.38	321.755	10.995
176.32	174.632	350.952	1.688
148.628	145.518	294.146	3.11
151.761	162.141	313.902	10.38
146.785	155.968	302.753	9.183
162.049	172.103	334.152	10.054
161.6	152.435	314.035	9.165
133.596	136.174	269.77	2.578
162.306	167.322	329.628	5.016
mef2ca+/-, mef2aa+/-
L	R
150.221	142.453	292.674	7.768
158.073	164.694	322.767	6.621
142.637	149.359	291.996	6.722
155.309	145.705	301.014	9.604
134.176	146.4	280.576	12.224
142.478	141.608	284.086	0.87
137.23	159.768	296.998	22.538
