# Supplementary figures and images for: Variable paralog expression underlies phenotype variation
Source: eLife journal article supplement (doi:10.7554/elife.79247), 2022-09-22

Figure 1 - figure supplement 1

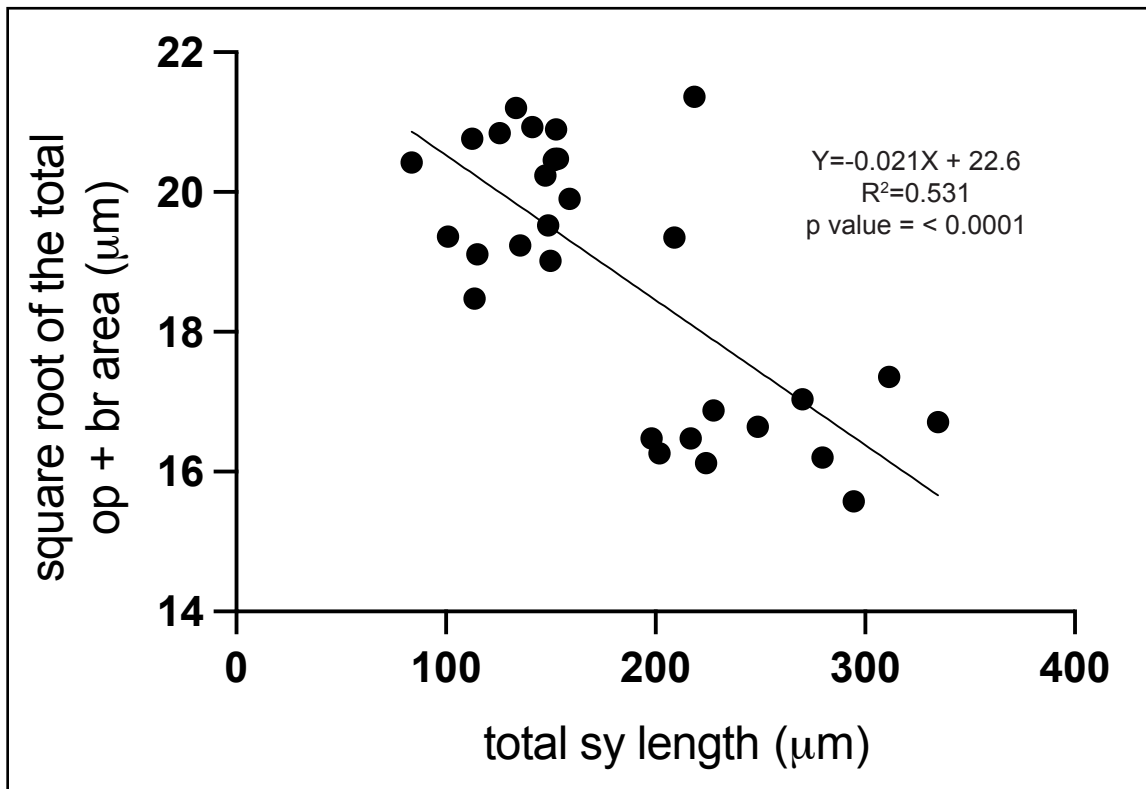

Supplement: supp [file elife-79247-supp-v1.zip]

Figure 5 - figure supplement 1

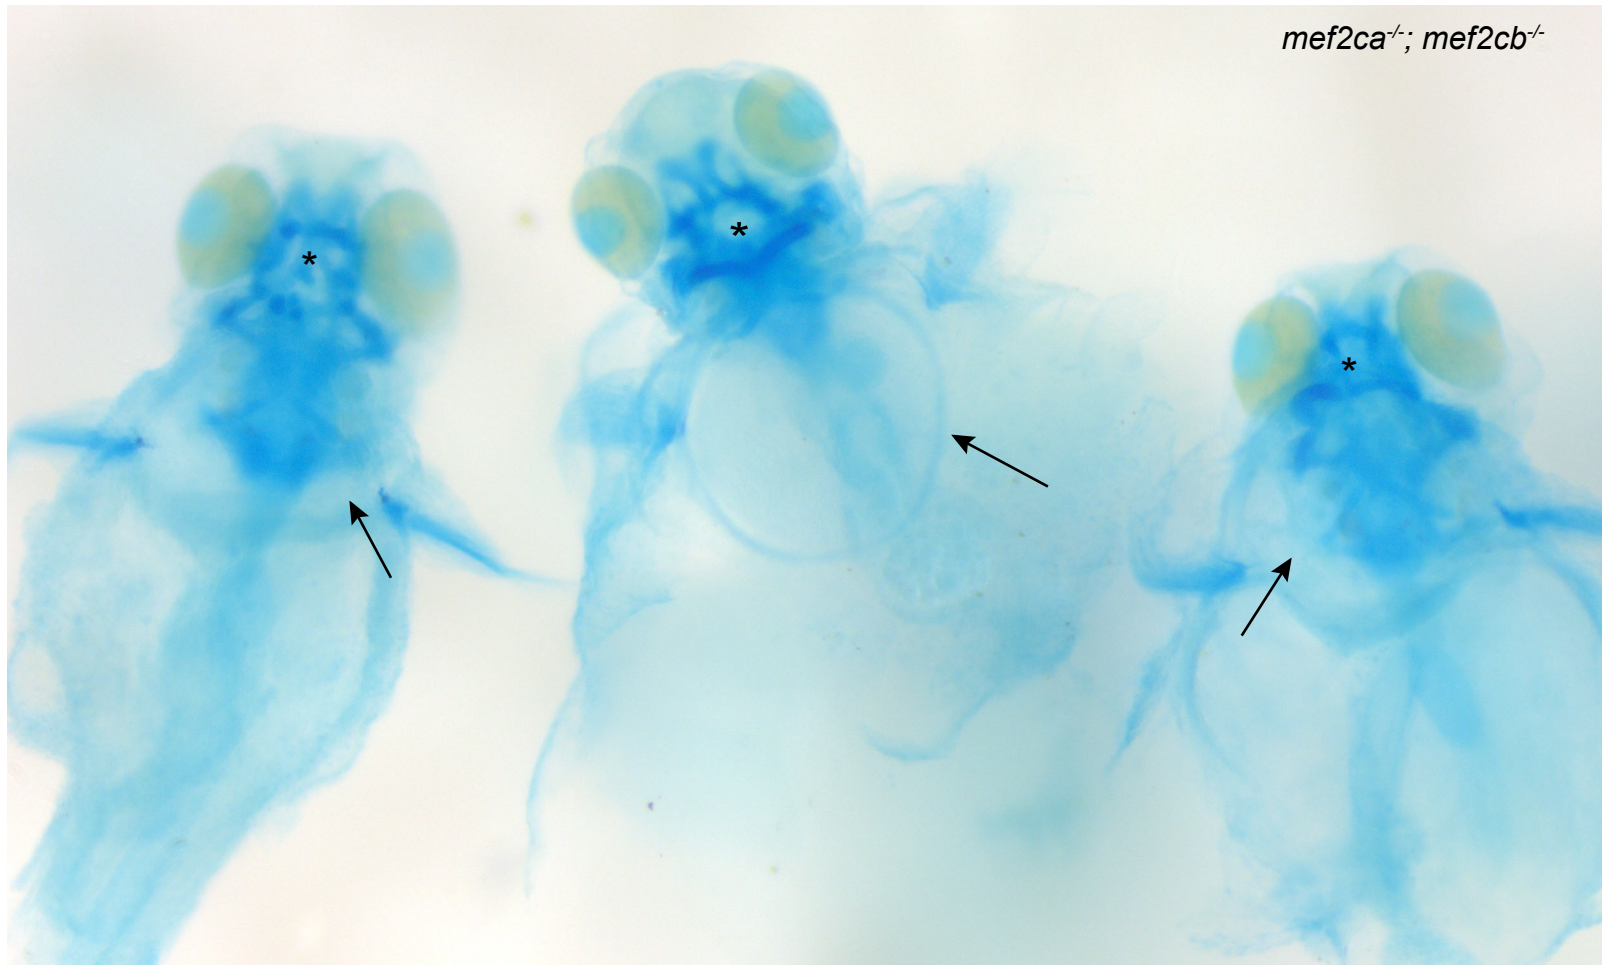

Supplement: supp [file elife-79247-supp-v1.zip]

Figure 4 - figure supplement 1

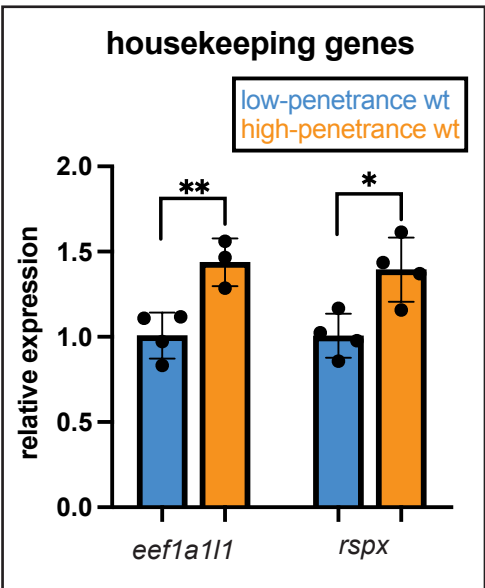

Supplement: supp [file elife-79247-supp-v1.zip]
